# Supplementary material
Source: HighWire-hosted journal article supplement (https://ard.bmj.com/content/81/2/232)

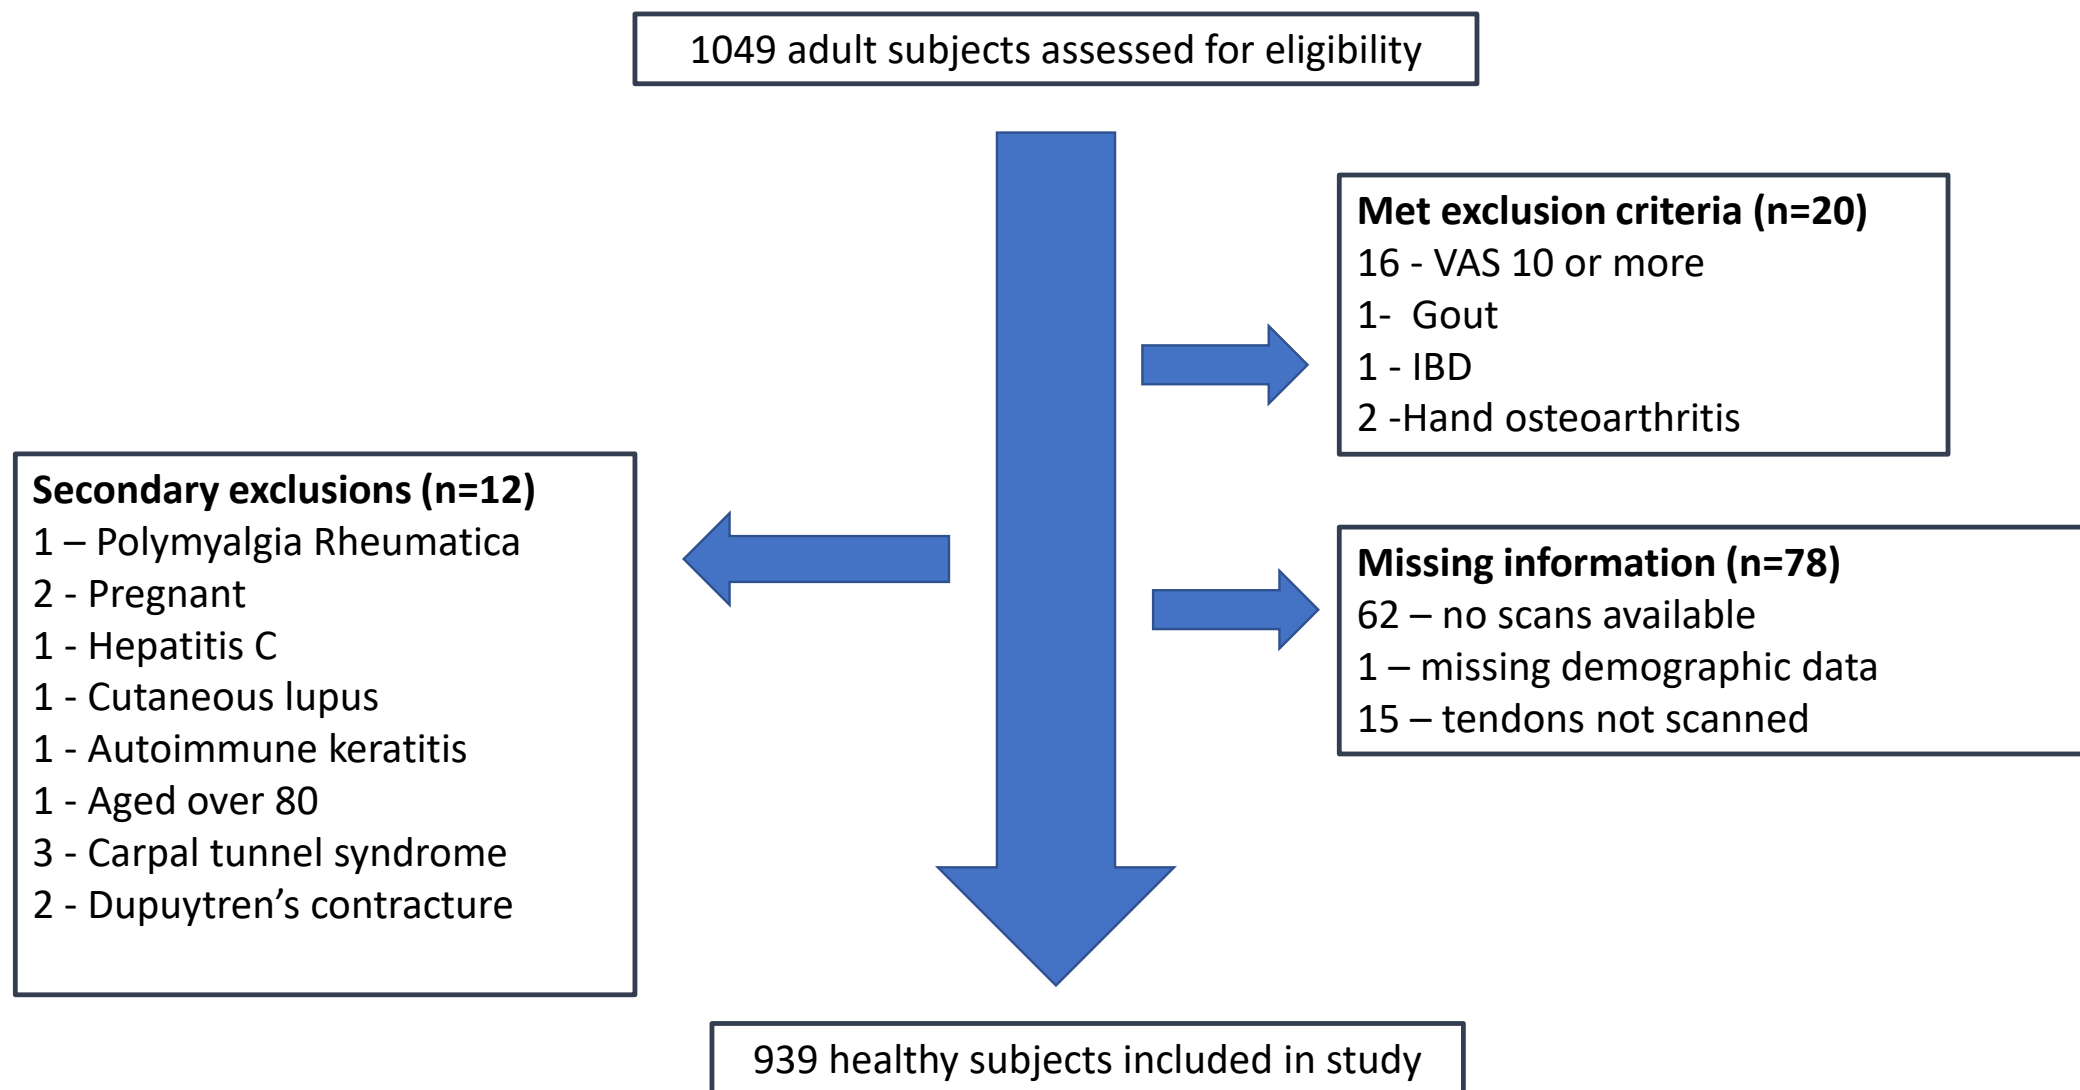

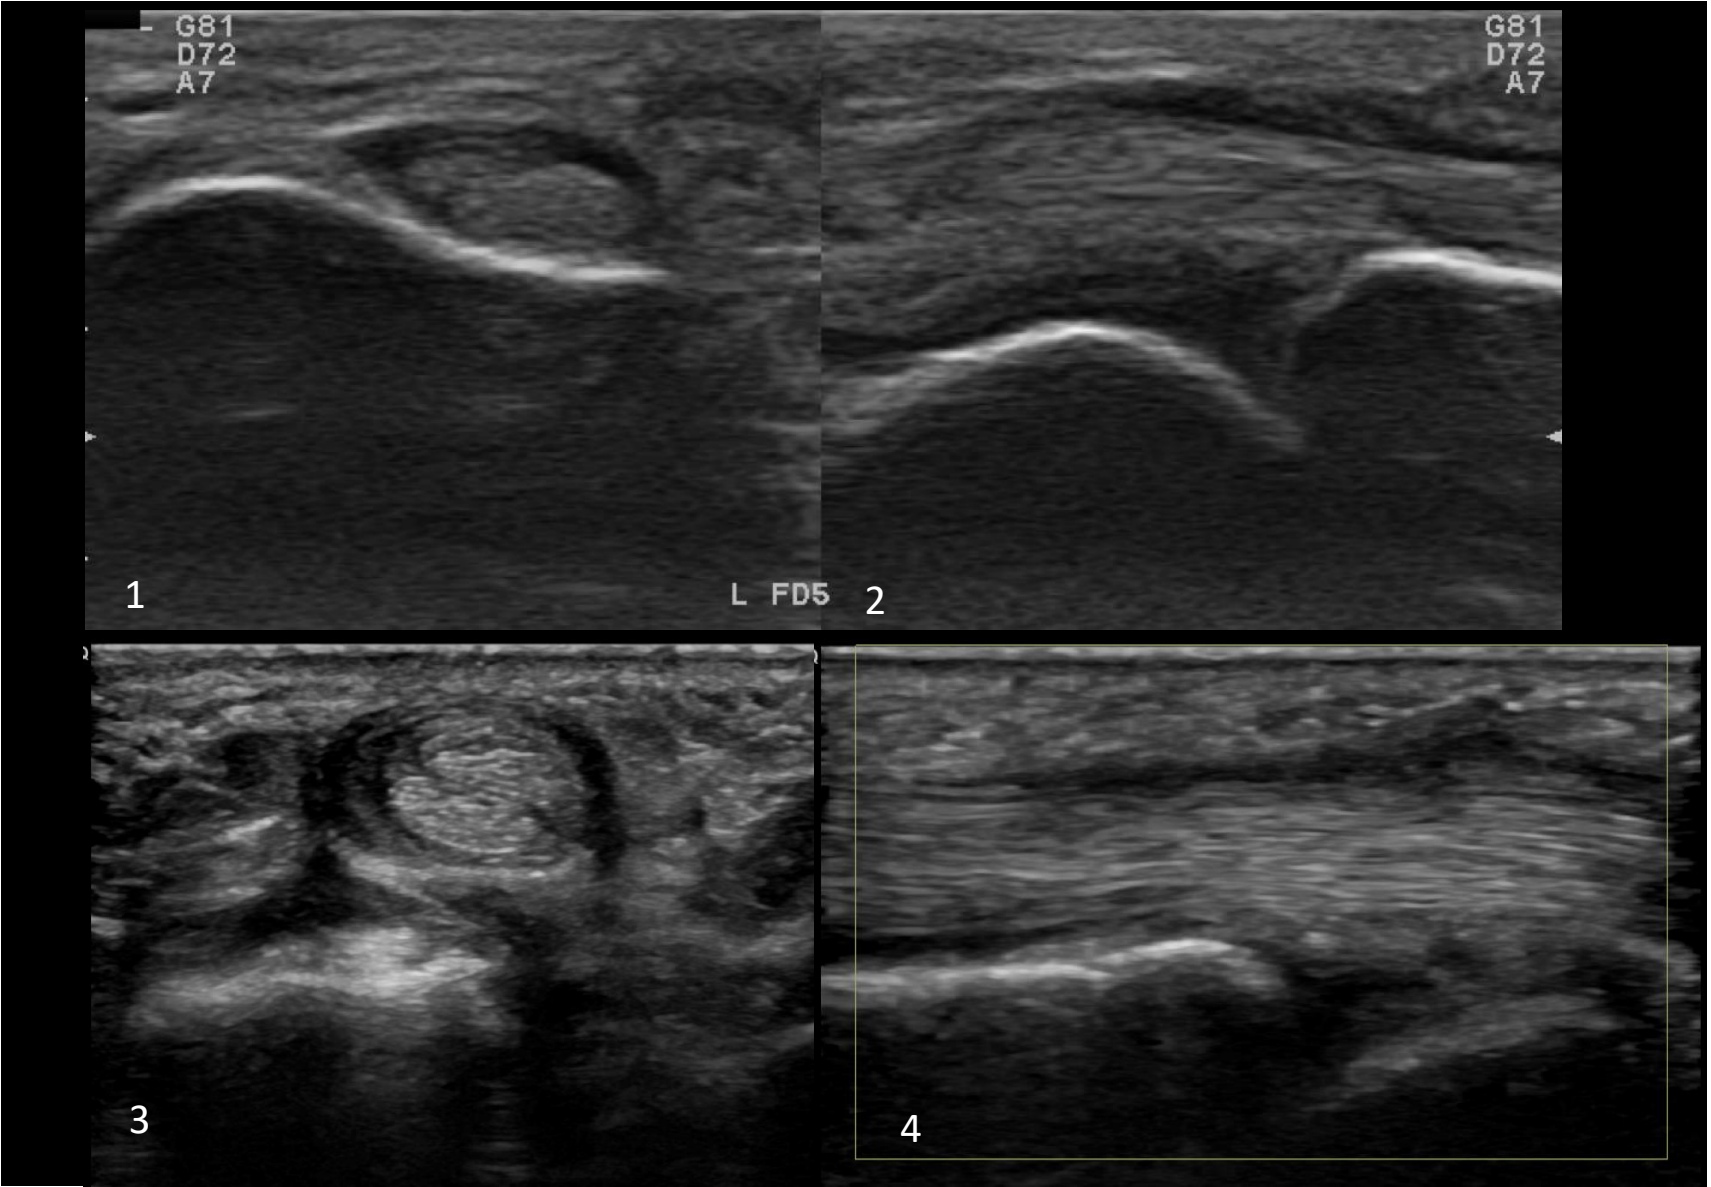

Supplement: inline-supplementary-material-2 [file inline-supplementary-material-2.pdf]
